# Supplementary material for: Compensatory Flux Changes within an Endocytic Trafficking Network Maintain Thermal Robustness of Notch Signaling
Source: PubMed Central journal article supplement (PMC4032575; doi:10.1016/j.cell.2014.03.050), 2014-05-22
Supplement: mmc1.pdf [file mmc1.pdf]

### Data File S1. Mathematical Modeling, Related to Figures 5 and 6.

We developed a computational model of the Notch signaling network, described by a set of ordinary differential equations. The model comprises three experimentally determined distinct routes to Notch activation: a) simplified canonical pathway (ligand-induced signaling), b) Deltex-dependent, late endosome-dependent, cholesterol-independent signaling pathway, and c) early endosome-dependent, cholesterol-dependent but late endosome-independent pathway (Data File S1 Figure 1).

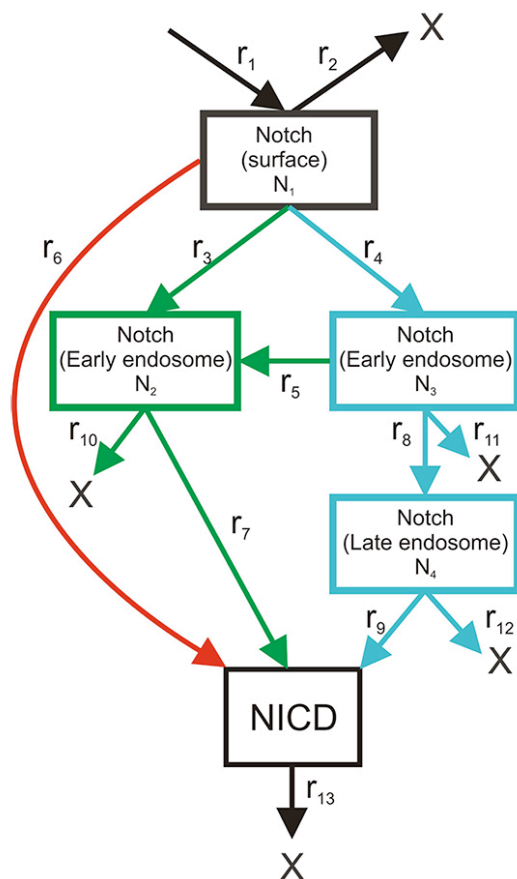

**Data File S1 Figure 1. Network Diagram Implemented in Modeling Studies.** Green colour represents cholesterol-dependent pathway, blue represents Dx-dependent, cholesterol-independent pathway, red represents ligand-dependent pathway. X means that Notch is degraded, while  $r_1$ - $r_{13}$  denote rates of particular steps.

Equations for the network model of Notch signaling are given below (equations 1 - 18). As there was no quantitative information about the kinetics of the reactions used in our model, all rate equations follow mass action kinetics (Equations 1 - 13), with kinetic constants  $k_i$  and  $c_i$ , apart from (8) where a saturating term is included for the early to late endosome maturation step.

Rate equations were:

$$r_1 = k_1 \quad (1)$$

Describes the rate of synthesis of Notch which was assumed to be constant as the simplest option requiring least parameter fitting.

$$r_2 = k_2[N_1] \quad (2)$$

This term assumes there are additional routes that can remove the receptor without signal activation beyond those routes directly under study in this model. This term allows a steady state of  $[N_1]$  to be achieved without excessive accumulation when  $Su(dx)$  and  $Dx$  pathways are removed.

$$r_3 = (k_3[Su(dx)] + c_3)[N_1] \quad (3)$$

$$r_4 = (k_4[Dx] + c_4)[N_1] \quad (4)$$

The rates  $r_3$  and  $r_4$  represent endocytosis of Notch to the early endosome through respectively GPI-protein positive and negative vesicular trafficking. The constants  $c_3$  and  $c_4$  were included to represent a background Notch endocytosis observed in the absence of  $Su(dx)$  and  $Dx$  expression.

$$r_5 = k_5[Su(dx)][N_3] \quad (5)$$

Describes transfer of Notch between GPI-protein negative to positive compartments of endosomal vesicles observed when Su(dx) and Dx are coexpressed. In this case we have not assumed a background flux in the absence of Su(dx). We have no evidence for this experimentally as the proportion of Notch in GPI-protein positive compartments does not increase during a time course of Notch endocytic uptake when Dx is expressed alone (Figure. 3N main text).

$$r_6 = k_6[Ligand][N_1] \quad (6)$$

A simplified term accounting for Notch activation by ligand, there is no constant term because entry into this activation pathway is entirely ligand-dependent. This route to activation is made separate to  $r_7$  and  $r_9$  routes based on experimental evidence that distinguishes different mechanisms as described in the main text of the paper.

$$r_7 = k_7[N_2] \quad (7)$$

This term represents Notch activation in the GPI-protein positive endosomal pathway which is independent of late endosomal trafficking.

$$r_8 = k_8[N_3] + \frac{c_{8a}[N_3]}{(c_{8b} + [N_3])} \quad (8)$$

This term accounts for transfer of Notch from the early endosome through the late endosome to the lysosome. The saturation term, defined by  $c_{8a}[N_3]/(c_{8b} + [N_3])$ , was included to take account of observations that Dx-induced signaling in the *Drosophila* wing is strongly potentiated by increasing late endosomal trafficking by expression of activated Rab7. We infer that in normal conditions the process of endosomal maturation and late endosomal fusion to the lysosome becomes rate limiting. The linear component  $k_8[N_3]$  of this term was not essential to the main features and predictions of the model but was included as high  $N_3$  concentrations resulting from

loss of Su(dx) would otherwise not lead to further increased Notch signaling when Dx was strongly expressed, as is observed in vivo. Experimentally, co-overexpression of Dx with Notch increases Notch signaling above that resulting from Dx expression alone, (data not shown) suggesting that increased Notch levels increase capacity for this endocytic activation route.

$$r_9 = (k_9[Dx] + c_9)[N_4] \quad (9)$$

Represents the Notch activation step which occurs on the lysosomal limiting membrane. The Dx term reflects a second role for Dx in promoting Notch retention on the limiting membrane, preventing Notch being sequestered into the internal luminal compartments. The  $c_9$  term assumes a low level of Notch retention on the limiting membrane in the absence of Dx.

$$r_{10} = (k_{10}[Su(dx)] + c_{10})[N_2] \quad (10)$$

Describes the transfer of Notch from the GPI-protein positive endosomal surface into internal luminal compartments, sequestering it from activation en route to a degradative step. Su(dx) promotes this transfer through a HECT domain dependent activity. The constant  $c_{10}$  represents Su(dx)-independent transfer. A low background of transfer can be inferred from the dominant negative activity of the HECT domain inactive Su(dx)V5 construct which prevents a basal rate of transfer of Notch from the endosomal limiting membrane into the internal luminal compartments (Figure 2N,O, main text).

$$r_{11} = k_{11}[N_3] \quad (11)$$

$$r_{12} = k_{12}[N_4] \quad (12)$$

The  $r_{11}$  and  $r_{12}$  terms account for removal of Notch from access to lysosomal activation by transfer into the multivesicular body in the GPI-protein negative route which can occur at different steps of endosomal maturation. These down regulatory steps can be inferred by the

strong Notch activation that occurs when ESCRT I,II, III components are removed as described in published work (see Fortini and Bilder 2009).

$$r_{13} = k_{13}[NICD]. \quad (13)$$

This term accounts for post-activation degradation of NICD.

Amounts of Notch signaling molecules at different stages of signaling pathways  $[N_i]$  are variables of the model. While  $[N_1]$  represents the concentration of Notch on the cell membrane,  $[N_2]$  to  $[N_4]$  represent concentration of Notch in internal cellular compartments (early or late endosomes).  $[NICD]$  is the final amount of the signaling molecule that is transported to the cell nucleus. Reaction rate constants  $k_i$  and  $c_i$ , as well as  $[Dx]$ ,  $[Su(dx)]$  and  $[Ligand]$  are parameters of the model.

Ordinary differential equations describing states of  $[N_i]$  and  $[NICD]$  (arbitrary units) were:

$$\frac{d[N_1]}{dt} = r_1 - r_2 - r_3 - r_4 - r_6 \quad (14)$$

$$\frac{d[N_2]}{dt} = r_3 + r_5 - r_7 - r_{10} \quad (15)$$

$$\frac{d[N_3]}{dt} = r_4 - r_5 - r_8 - r_{11} \quad (16)$$

$$\frac{d[N_4]}{dt} = r_8 - r_9 - r_{12} \quad (17)$$

$$\frac{d[NICD]}{dt} = r_6 + r_7 + r_9 - r_{13}. \quad (18)$$

Steady state was found by solving

$$\frac{d[N_i]}{dt} = 0 \quad (19)$$

$$\frac{d[NICD]}{dt} = 0 \quad (20)$$

using Wolfram Mathematica 7. The solution of the system (available on request) was calculated for a given set of parameters to determine the equilibrium distribution of fluxes through the pathways represented in Data File S1 Figure 1. Using equations for steady state, for a given set of  $k_i$  and  $c_i$  parameters we calculated (in Matlab R2010a) total [NICD] for a range of [Dx] and [Su(dx)] concentrations from 0 (gene knock out) to 3 (3 fold overexpression).

### **Parameter setting and modeling of Notch signaling in *Drosophila* wing at 29°C**

Using this model we wished to identify a set of parameters which was capable of reproducing changes to Notch signaling observed after loss of function of Su(dx) or Dx components. Wild type [Dx], [Su(dx)] and [Ligand] were set to 1 and values of [Dx] and [Su(dx)] were then altered to model mutant phenotypes. We did not have a sufficiently quantitative objective function to allow automated search of parameter space. Instead parameters were initially set to 1, and then manually optimised to identify a parameter set which fit the following qualitative data from experimental observations made in fly wings at 29°C (Data File S1 Table 1).

- In double null mutant ( $dx, Su(dx)$  mutant), no mutant phenotype is observed, Notch signaling is approximately at the wild type level.
- In the absence of Deltex ( $dx$  mutant), wild type level of Su(dx) leads to lowered Notch signaling.

- In the absence of Suppressor of Deltex (*Su(dx)* mutant), Notch signaling increases with increasing [Dx].

A set of parameters which fit these criteria are displayed in Data File S1 Table 1.

**Data File S1 Table 1: Values of Kinetic Parameters in the Wing at 29°C**

|          |     |          |           |
|----------|-----|----------|-----------|
| $k_1$    | 1.4 | $k_{11}$ | 1         |
| $k_2$    | 10  | $k_{12}$ | 70        |
| $k_3$    | 240 | $k_{13}$ | 0.06      |
| $k_4$    | 420 | $c_3$    | 320       |
| $k_5$    | 100 | $c_4$    | 350       |
| $k_6$    | 500 | $c_{8a}$ | 0.57      |
| $k_7$    | 15  | $c_{8b}$ | $10^{-6}$ |
| $k_8$    | 1.2 | $c_9$    | 20        |
| $k_9$    | 108 | $c_{10}$ | 50        |
| $k_{10}$ | 250 |          |           |

A feature of the model which affected whether the simulated double *dx*; *Su(dx)* mutant was phenotypically equivalent to wild type was  $k_9$  versus  $k_{12}$  ratio. By altering the rate of a single step - parameter  $k_9$ , simulations of Notch signaling resulted in different predicted outcomes of simultaneously removing both *Su(dx)* and *Dx* (Figure 6A,B main text compared to Figure 5B). Five fold reduction of  $k_9$  led to stronger Notch signaling in the double mutant combination compared to when *Su(dx)* was removed alone. Thus *Dx* and *Su(dx)* cooperate to limit Notch activity. A five fold increase of the same parameter led to simulations of Notch signaling whereby the *Su(dx)* mutation failed to completely suppress loss of function *dx* mutant phenotypes. Phenotypes were predicted to be temperature sensitive as depicted. Similar outcomes were found by instead increasing  $k_{12}$  (data not shown).

## Modeling of temperature sensitivity of Notch signaling

To simulate temperature sensitivity of the Notch signaling pathway, we assumed from experimental observations that only kinetic parameters  $k_3$ ,  $k_5$ ,  $k_6$  and  $k_{10}$  are temperature-dependent. The set of parameters found to reproduce experimental observations of wing phenotypes at 29°C was used as a starting point for temperature dependence simulations. Starting with the 29°C parameter set, temperature sensitive parameters were expected to decrease linearly with decreasing temperature, until they reached value 0 (Data File S1 Figure 2). Parameter  $k_{10}$  was allowed to reach a negative value (-20) at low temperatures, to reflect a dominant negative effect of HECT inactive  $Su(dx)$  on the background Notch transfer from the endosomal limiting membrane into the multivesicular body. Note the latter value of  $k_{10}$  reduces the rate  $r_{10}$  by impacting on the basal  $Su(dx)$ -independent flux, but does not make the overall value of the  $r_{10}$  flux negative. The simulations predicted an enhancement of the  $dx$  mutant phenotype by removal of  $Su(dx)$  at low temperatures and a reversal of temperature sensitivity of the  $dx$  mutant phenotype, i.e. below a critical temperature the  $dx$  mutant phenotypes were expected to worsen as temperatures were further lowered. Predictions were experimentally verified as described in main text. The simulated temperature at which the cooperative effects of  $Su(dx)$  and  $dx$  mutants emerge depends on the parameter values chosen at 18°C for  $k_3$ ,  $k_5$ ,  $k_6$  and  $k_{10}$ . The parameter values utilised to simulate temperature changes displayed in Figure 5I in the main text are given in Data File S1 Table 2 and reflect the temperatures at which these phenotypic outcomes were observed in vivo.



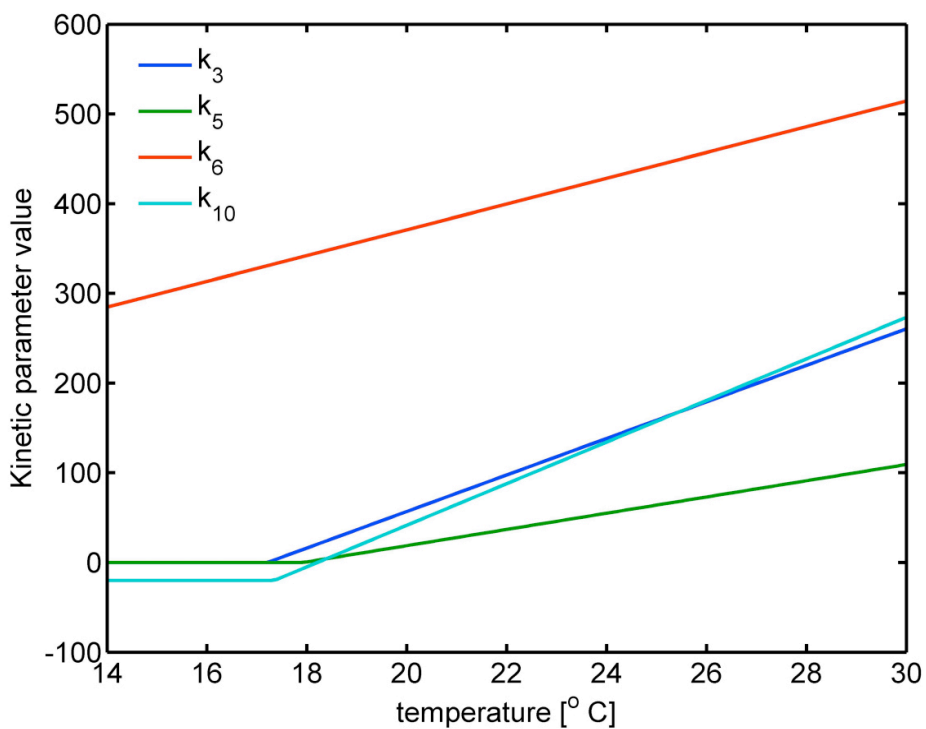

**Data File S1 Figure 2. Temperature Sensitivity of Kinetic Parameters.** Values of kinetic parameters at 18°C and 29°C were fitted to reproduce experimental observations, changing linearly, and extended to lower temperatures, flattening when a value 0 is reached. Parameter  $k_{10}$  was allowed to reach a negative value (-20) at low temperatures to reflect experimental observations.

**Data File S1 Table 2. Temperature Dependent Parameters**

| Parameter | Value at 18°C | Value at 29°C |
|-----------|---------------|---------------|
| $k_3$     | 16            | 240           |
| $k_5$     | 0.5           | 100           |
| $k_6$     | 342           | 500           |
| $k_{10}$  | -5            | 250           |

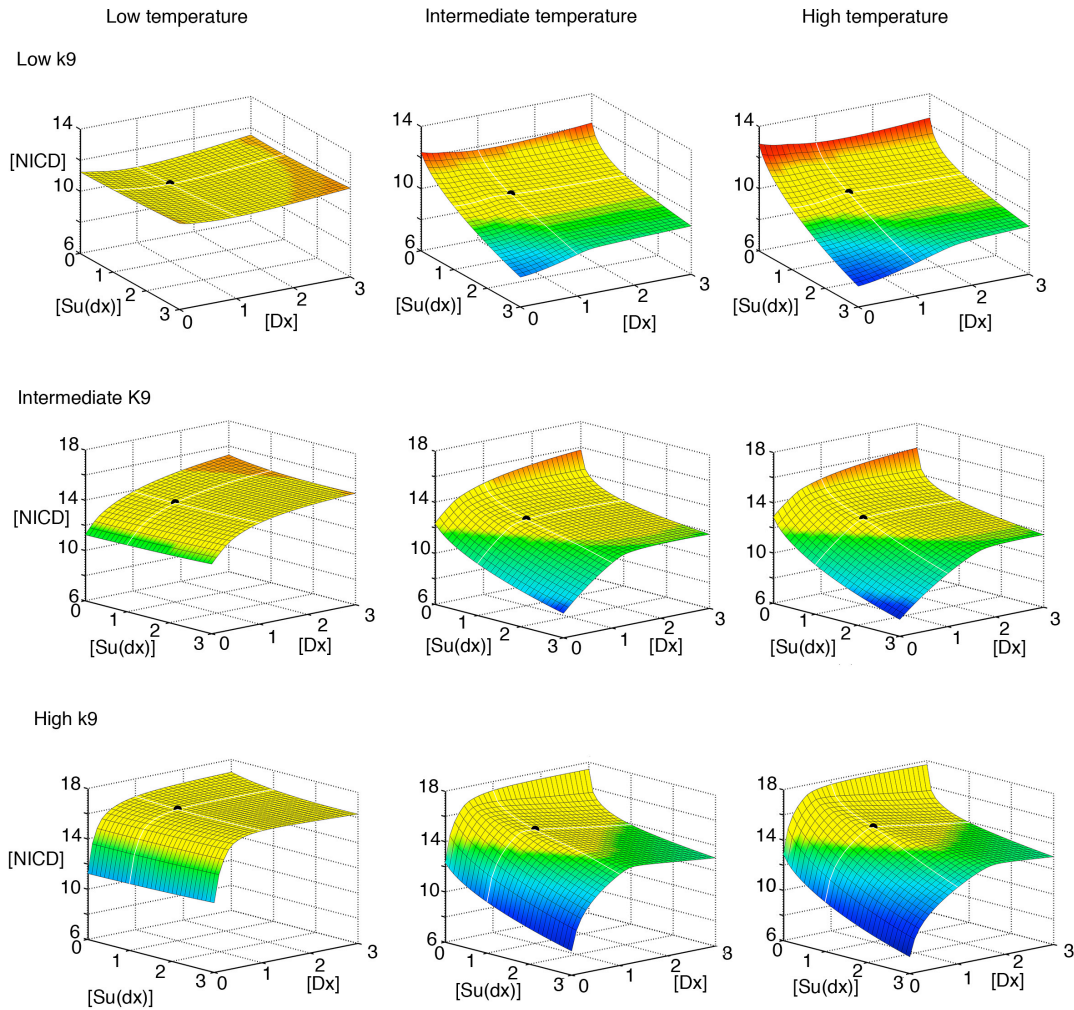

**Data File S1 Figure 3. Dependency of [NICD] on [Su(dx)], [Dx] and Temperature For Low, Intermediate and High Values of  $k_9$ .** At each temperature all other parameters are the same. In each case the black dot indicates wild type levels of [Su(dx)] and [Dx]. Low, intermediate and high temperature correspond to 18°C, 25°C and 29°C. The values of  $k_9$  range between between 5 fold lower and 5 fold greater than intermediate value provided in Data File S1 Table 1. Yellow shading corresponds to expected WT, orange to red represents increased expectation of Notch gain of function phenotypes, and green to blue represents increased expectation of loss of Notch function phenotypes, thresholding on graphs for low intermediate and high temperatures was based on in vivo analyses of respectively leg, wing and embryo midline phenotypes.

### **Temperature compensation mechanism.**

Three main fluxes contribute components of NICD generation through  $r_6$ ,  $r_7$  and  $r_9$  depicted in (Data File S1 Figure 1). As illustrated by Data File S1 Figure 4, in WT the temperature dependent increase of  $r_6$  (ligand stimulated) is balanced by changes to  $r_9$  (Dx-dependent) and  $r_7$  (sterol-dependent) components, hence maintaining a flat response to temperature of the overall signaling levels. These changes are brought about by increase in temperature sensitive parameters  $k_3$  and  $k_{10}$  which direct more Notch through the cholesterol-dependent endocytic pathway to be degraded. This flux reduces signal production through  $r_6$  and reduces entry of Notch by the Dx-driven endocytic route  $r_4$ . The increase in temperature-dependent parameter  $k_5$  (post-endosomal transfer between Dx and Su(dx) trafficking routes) has little effect on temperature compensation as decreasing endocytic entry through  $r_4$  at higher temperature reduces  $[N_3]$  and hence flow through  $r_5$ . Simulations which assume  $k_5$  is constant with temperature do not alter temperature response of overall Notch signaling (data not shown). Presence of flux through  $r_5$  does however contribute to the observed flat response of Notch signaling to increasing Dx expression at 29°C by maintaining  $[N_3]$  low.

### **Explanation of $dx$ and $Su(dx)$ mutant phenotypes.**

Data File S1 Figure 4 illustrates how the different fluxes to NICD generation are affected by mutations in  $dx$  or  $Su(dx)$ . In a  $dx$  mutant, flux through  $r_4$  is reduced to background level resulting in decreased activation through  $r_9$  (late endosomal/lysosome route). However the consequences of the reduction in  $r_9$  are ameliorated by increased activation through the  $r_6$  route which is normally reduced by Dx activity. Depending on the value of the parameter  $k_9$  the loss of  $dx$  can have a positive or negative consequence on overall NICD generation (Data File S1 Figure 3) and hence the effect of  $dx$  loss of function can be further suppressed or enhanced by

temperature-dependent changes to the competing endocytic flux through  $r_7$  and  $r_{10}$  (Data File S1 Figure 4). The temperature dependent nature of  $r_6$ ,  $r_7$  and  $r_{10}$  thus gives rise to the temperature-dependent phenotypes of  $dx$  mutants at both temperature extremes.

In  $Su(dx)$  mutants the endocytic flux through  $r_7$  falls to background levels and there is a small increase of flux through  $r_6$  (ligand-dependent activation) and endocytic entry of Notch through  $r_4$  is increased, resulting in increased Notch activation through  $r_9$ . These effects are more evident as temperature increases. The gain of function Notch phenotype observed in  $Su(dx)$  mutants therefore results from small temperature-dependent increases of Notch signaling through both ligand-induced and Dx-induced Notch activation pathways.

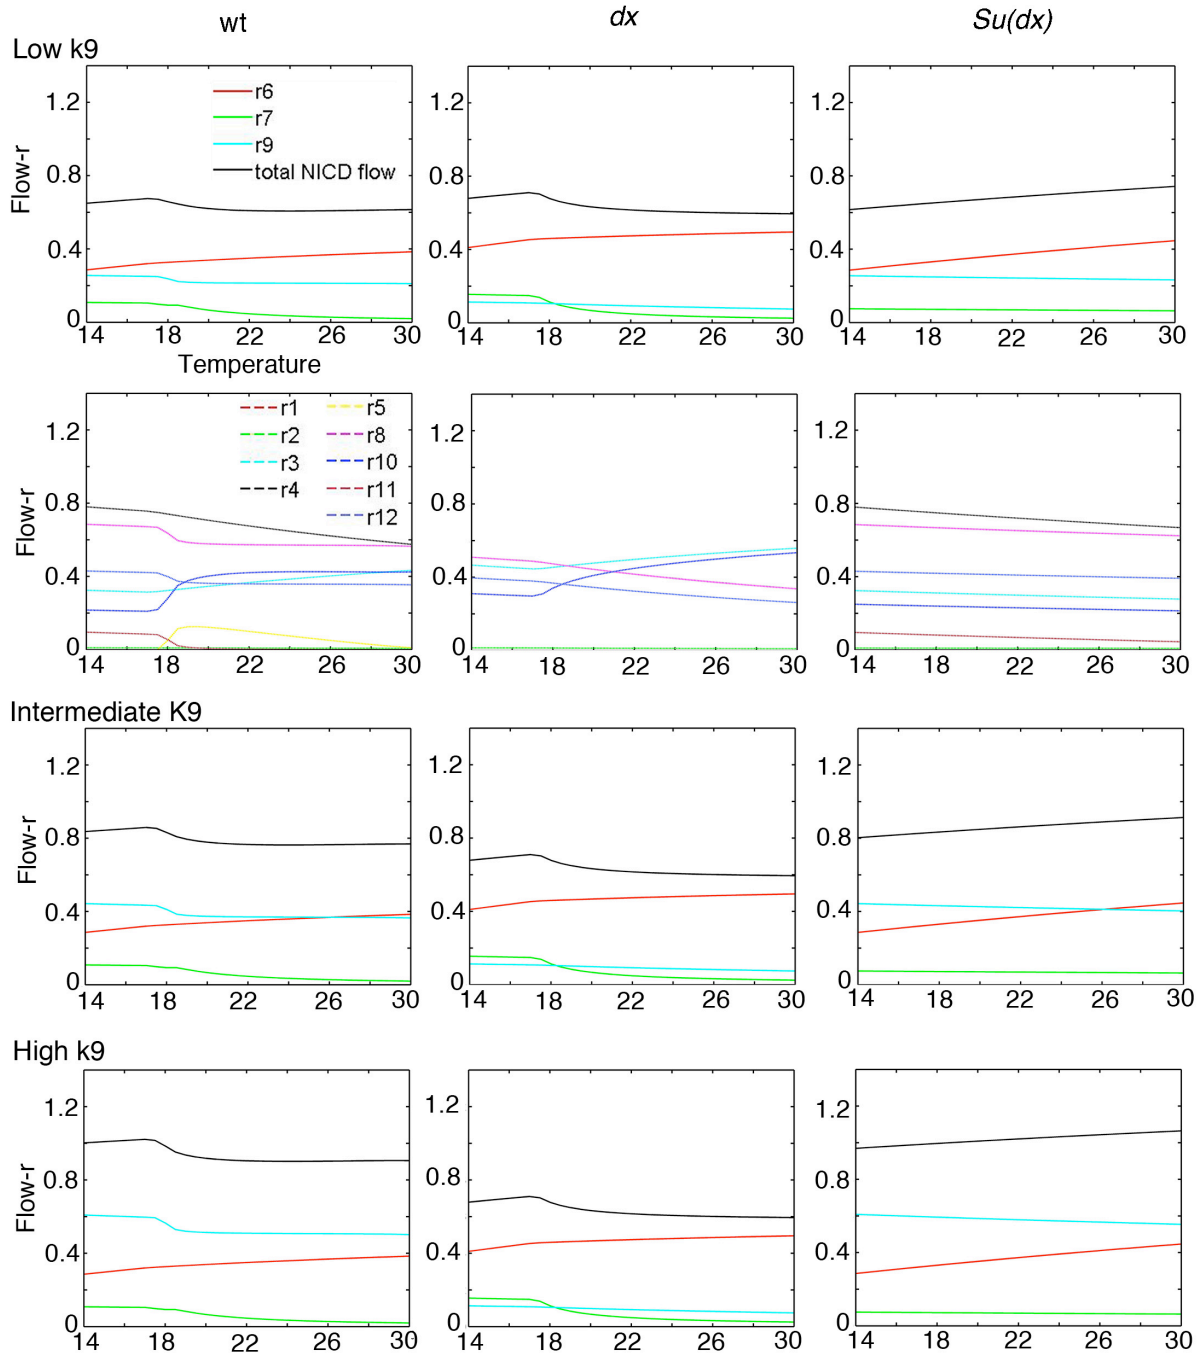

**Data File S1 Figure 4. Flow Through Different Steps of the Model Over a Simulated Physiological Temperature Range.** The consequences of  $dx$  and  $Su(dx)$  mutations on NICD generation are illustrated for low, intermediate and high values of  $k_9$ . Changes to flow ( $r$ ) through routes other than the NICD generating steps ( $r_6, r_7, r_9$ ) are shown only for the low  $k_9$  set, but similar changes are observed for all  $k_9$  conditions.
